# Supplementary material for: Hydrodynamics of a high Alpine catchment characterized by four natural tracers
Source: Copernicus journal article supplement (doi:10.5194/hess-27-1403-2023), 2023-04-03
Supplement: Supplementary file 1 [file hess-27-1403-2023-supplement.pdf]

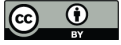

*Supplement of*

## **Hydrodynamics of a high Alpine catchment characterized by four natural tracers**

**Anthony Michelon et al.**

*Correspondence to:* Natalie Ceperley ([natalie.ceperley@giub.unibe.ch](mailto:natalie.ceperley@giub.unibe.ch))

The copyright of individual parts of the supplement might differ from the article licence.

## Supplementary Material

### Summary:

This document contains pictures of the Vallon de Nant catchment (Figure S1 and Figure S2) and gauging station at the outlet (Figure S3). Next the Figure S4 shows the hypsometric curve of the Vallon de Nant. The Figure S5 presents three streamflow measurements along the stream, and the Figure S6 the location of all springs in the catchment. The Figure S7 presents a comparison of the electric conductivity of water samples when they were measured in the field and in the lab months later. Figure S8 combines time series of water table depth and temperature at PZ1 and PZ2. Figure S9 is an illustration of the 7-day moving average and Figure S10 is a dual-isotope plot of all samples.

Table S1 gives the location of the measurement points. Table S2 summarizes the start and end dates of each hydrological period and characteristic flow conditions and the Table S3 gives the start and end dates of each snowcover period at the soil temperature points.

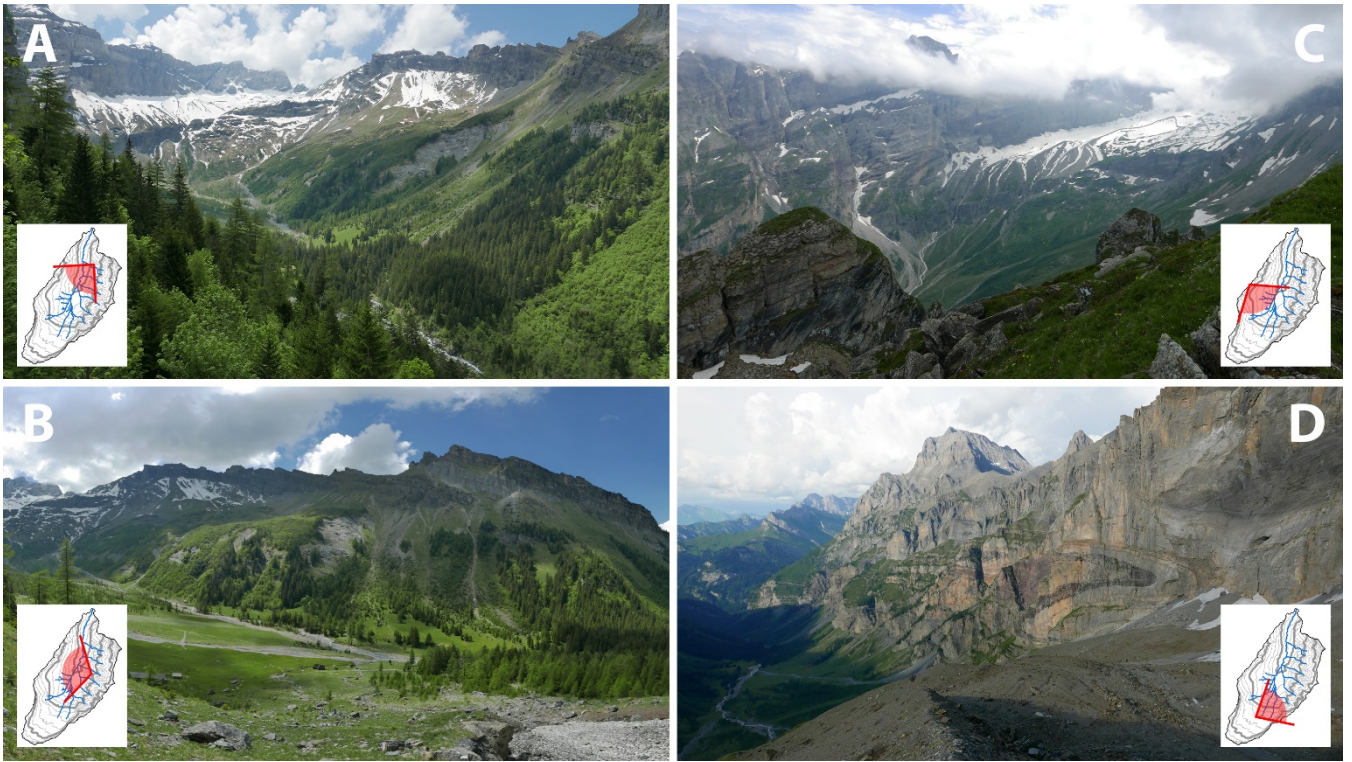

**Figure S1:** Pictures of the Vallon de Nant taken during different the field work seasons

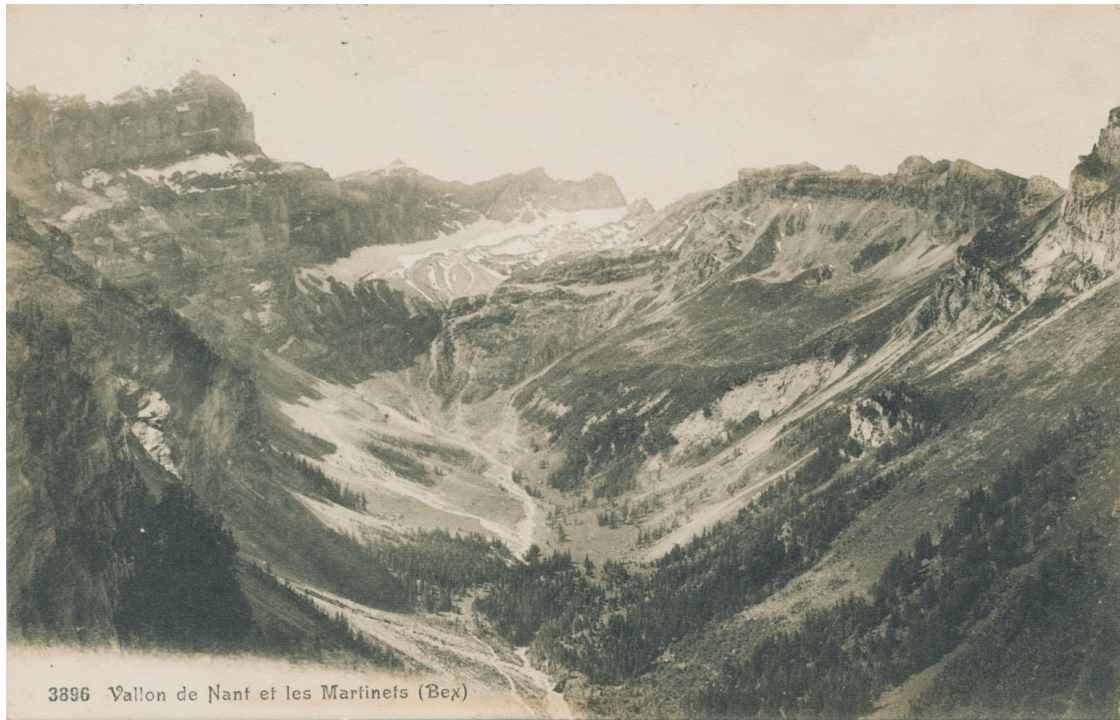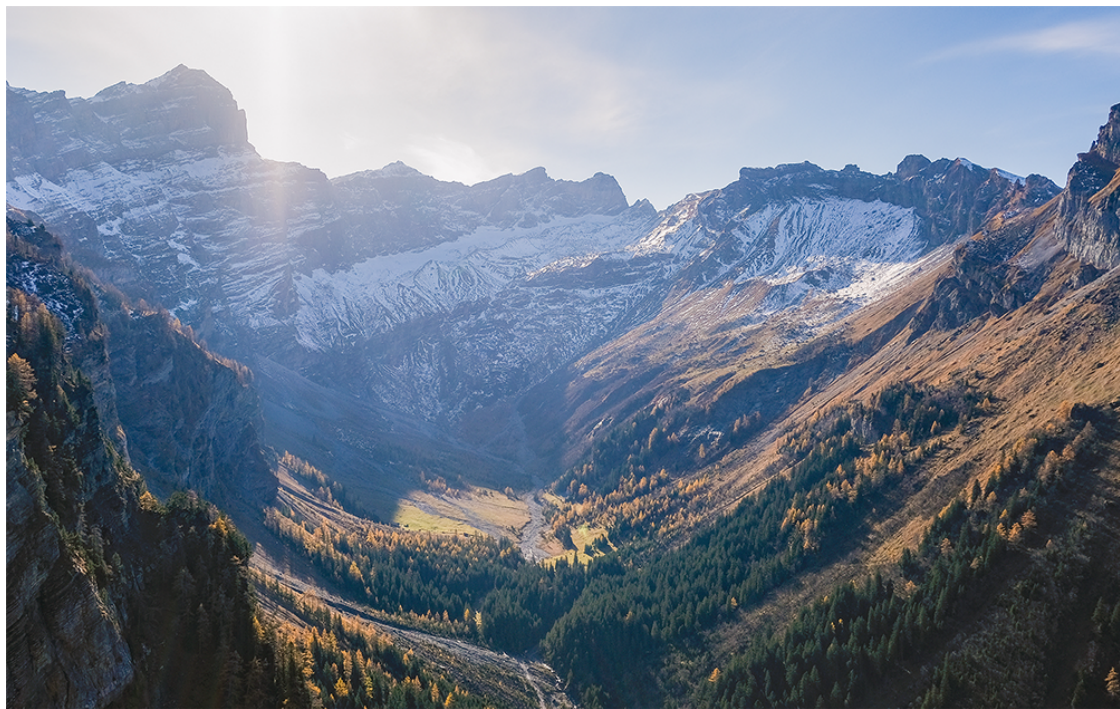

**Figure S2:** Comparison of vegetation cover between a historical picture (1912 or before, on top) and an actual picture (2017, on bottom). Credit for the top picture: Robert di Salvo

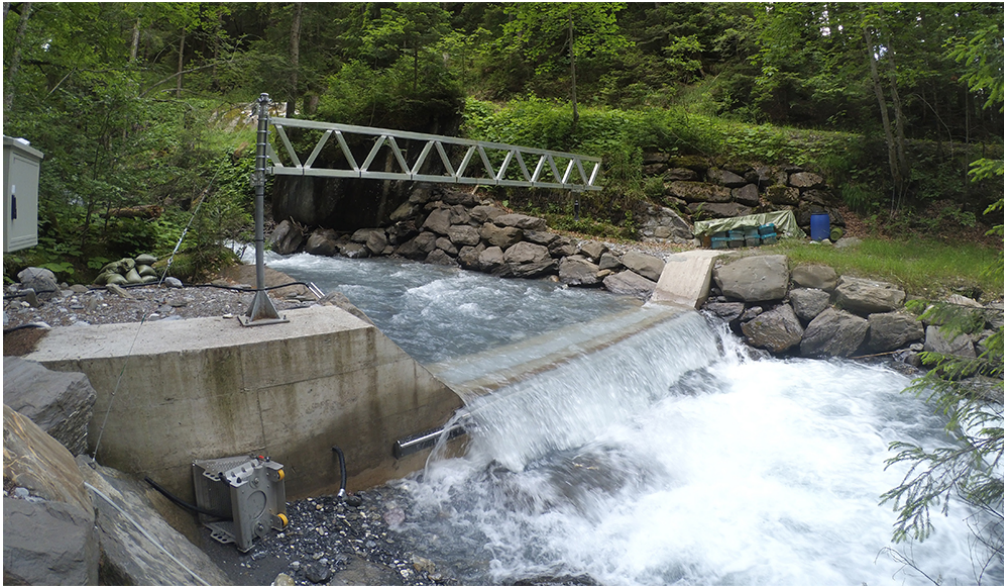

**Figure S3:** River stage measure at the outlet. The streamflow is here measured between  $0.96$  and  $1.13 \text{ m}^3 \cdot \text{s}^{-1}$ .

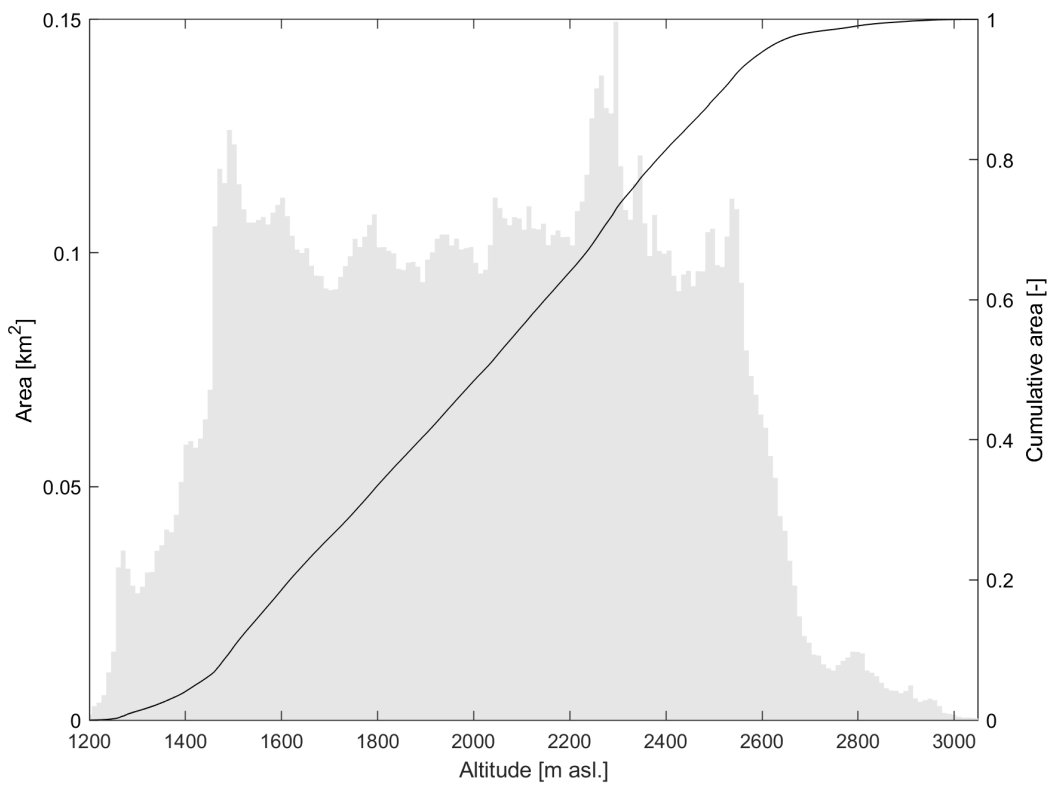

**Figure S4:** Hypsometric curve of the Vallon de Nant.

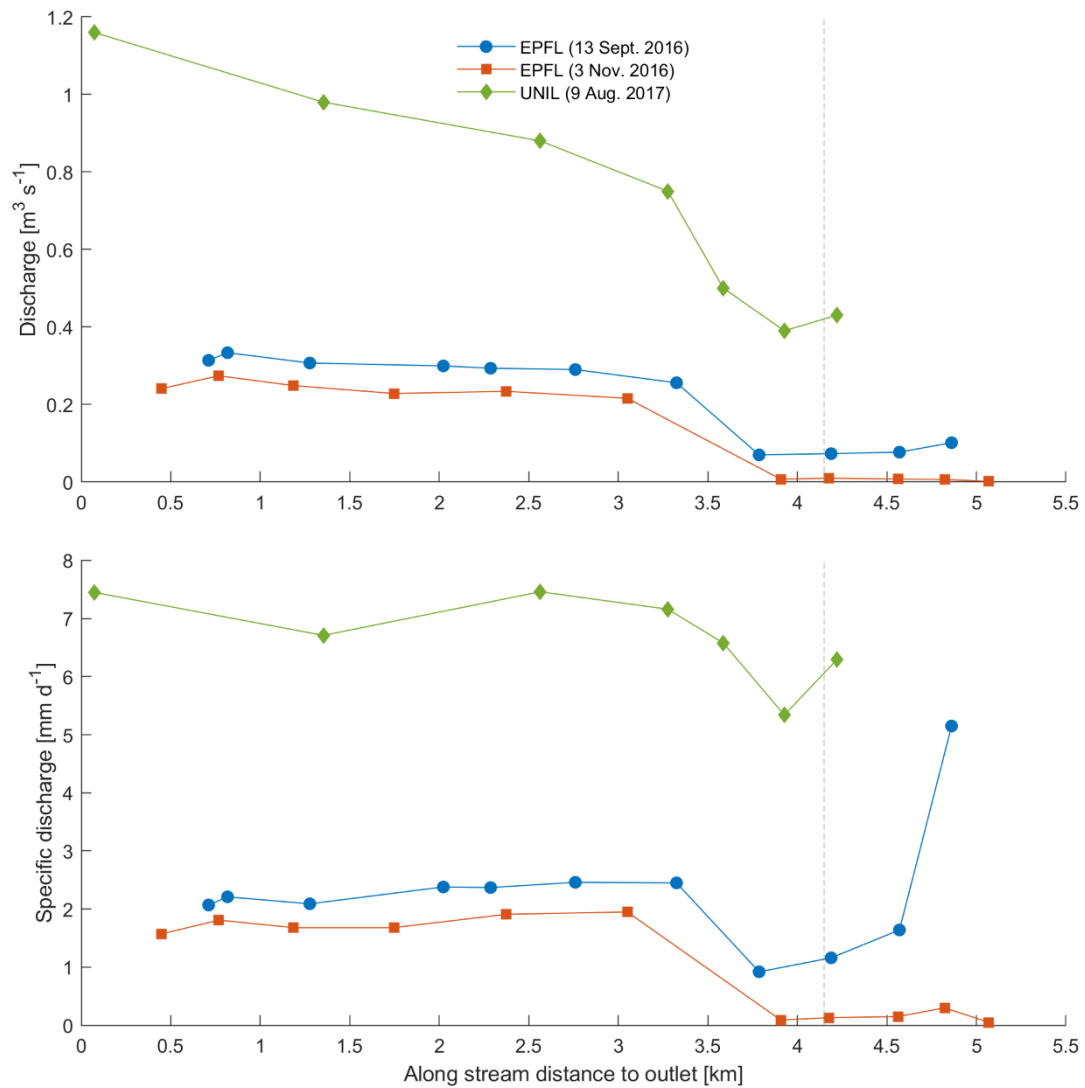

**Figure S5:** Discharge (top) and specific discharge (bottom) along the main stream measured by the Stream Biofilm and Ecosystem Research Laboratory group (EPFL) and the Catchment hydrology group (UNIL). The mean specific discharge measured at the outlet during the measures was  $2.2 \text{ mm d}^{-1}$  ( $1.7$  to  $2.8 \text{ mm d}^{-1}$ ) on 13 Sept. 2016,  $2.0 \text{ mm d}^{-1}$  ( $1.5$  to  $2.5 \text{ mm d}^{-1}$ ) on 3 Nov. 2016, and  $3.6 \text{ mm d}^{-1}$  ( $2.9$  to  $4.4 \text{ mm d}^{-1}$ ) on 9 Aug. 2017. The vertical line at 4.15 km shows the stream network node beyond which the followed path diverges between the main stream (3 Nov. 2016) and an affluent (13 Sept. 2016 and 9 Aug. 2017).

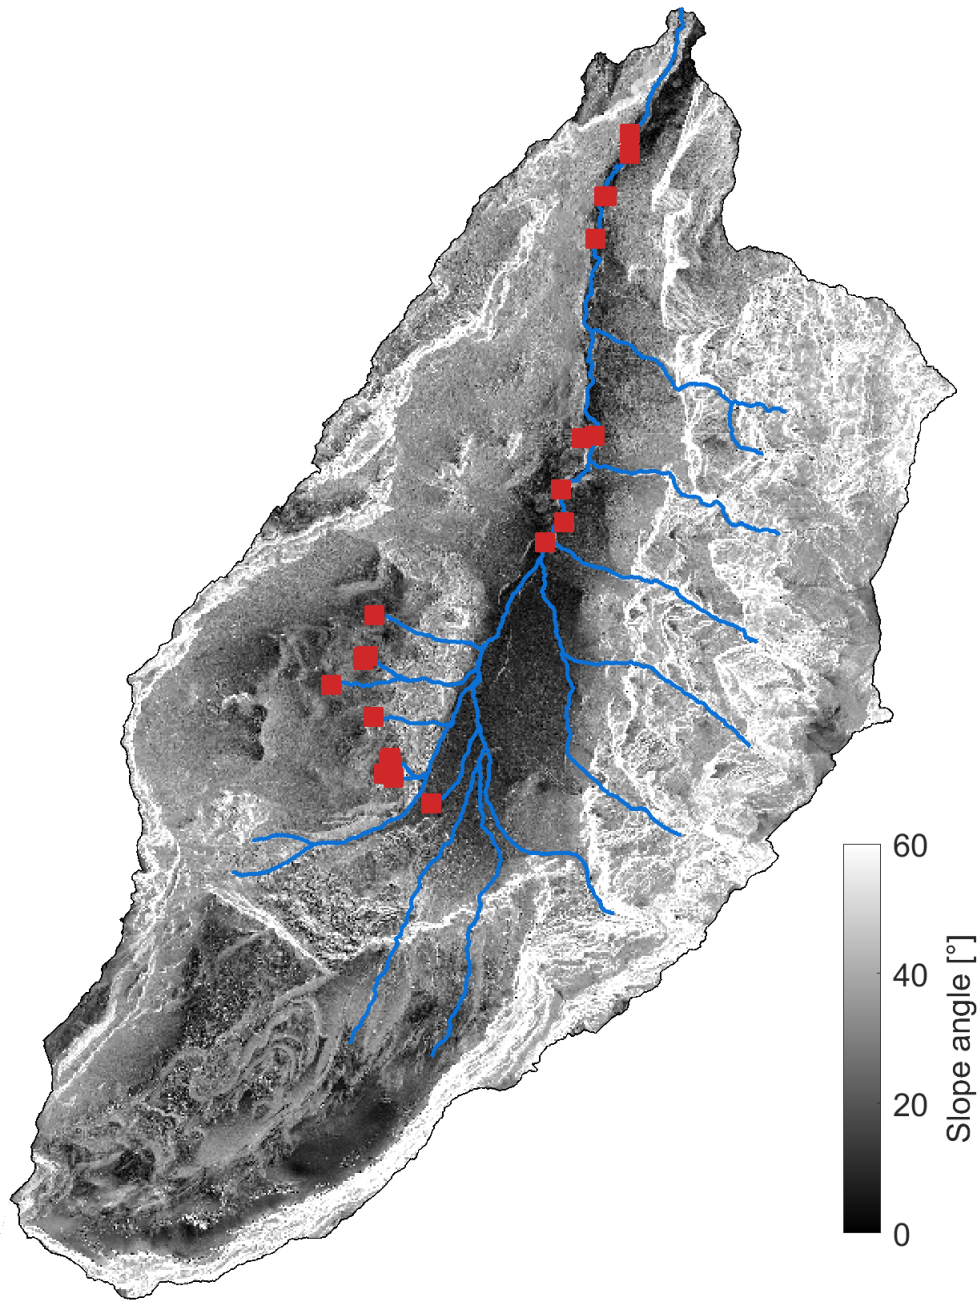

**Figure S6:** Location of all the springs (red square dots) in the Vallon de Nant. The slopes calculation is based on a digital elevation model at a resolution of 2 m (swissAlti3D, 2012).

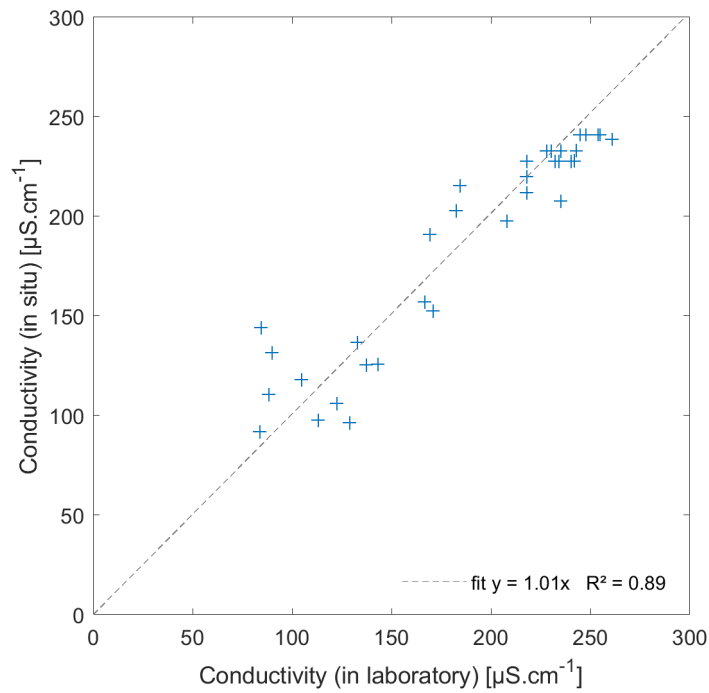

**Figure S7:** Comparison of 38 samples conductivity measured on the field using a WTW Multi 3510 IDS with a WTW TetraCon 925 probe (Xylem Analytics Germany Sales GmbH & Co, Weilheim, Germany) or later in the laboratory directly within the 12 mL amber silicate vials using a JENWAY 4510 conductivity meter with a 6 mm glass probe (Stone, UK).

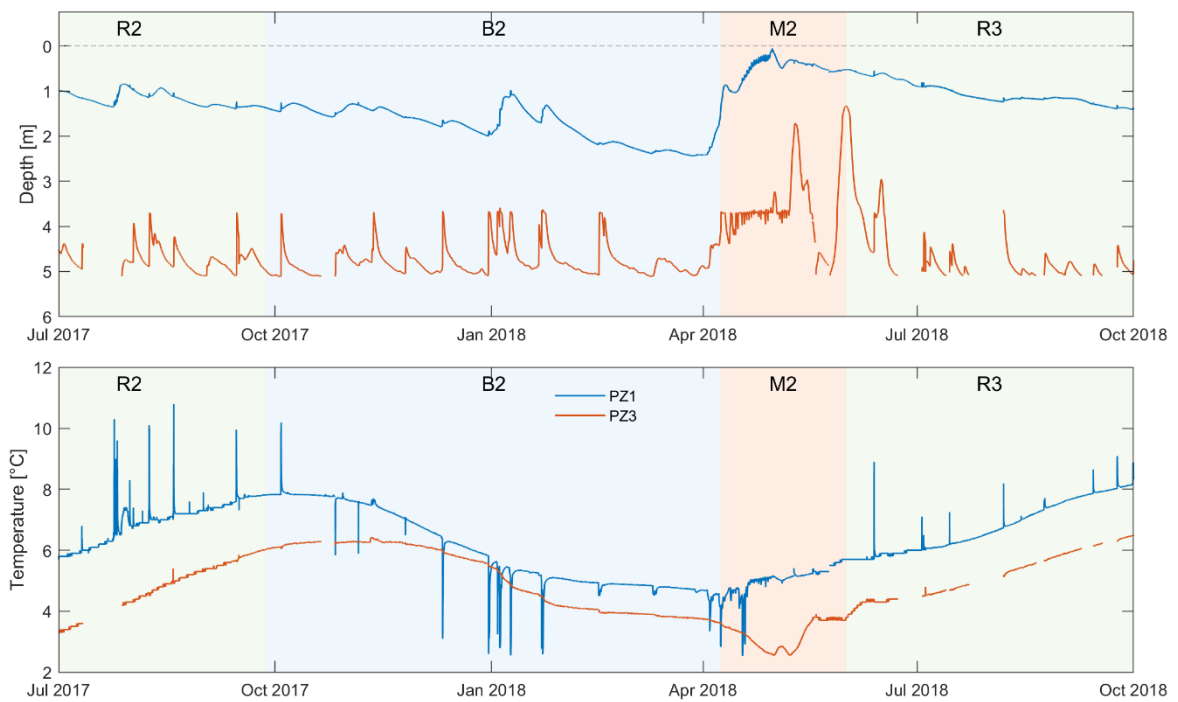

**Figure S8:** Water table depth (top) and temperature (bottom) at PZ1 and PZ2 from 1 July 2017 to 1 October 2018. Water table depth and temperature data are from Thornton et al. (2021).



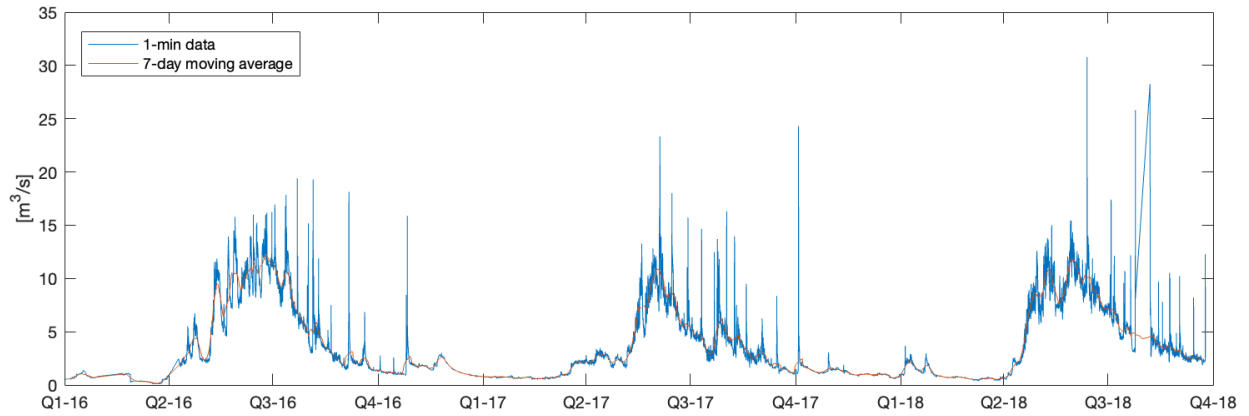

**Figure S9:** Illustration regarding the effect of a seven-day moving average on discharge measurements.

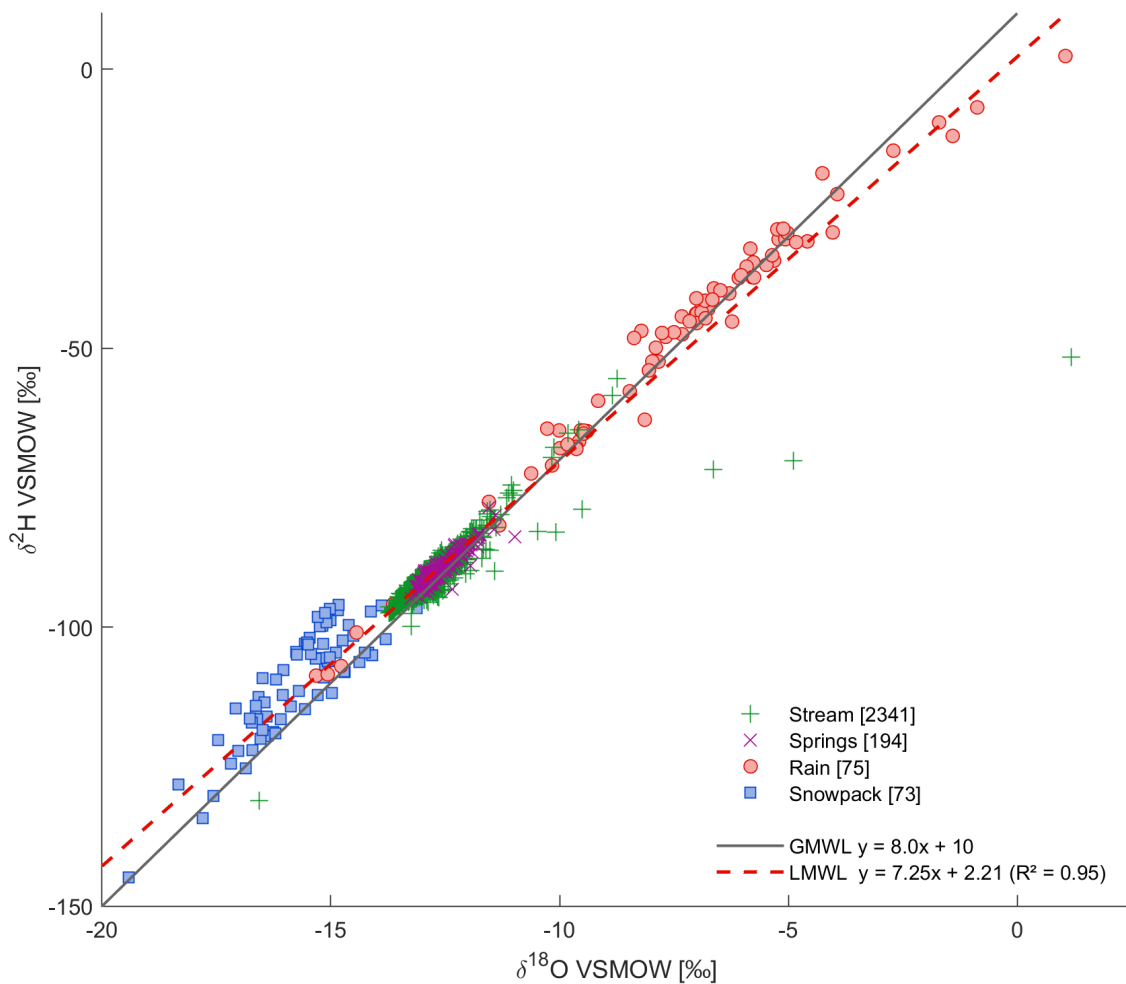

**Figure S10:** Dual isotope plot showing the strong correlation of  $\delta^2\text{H}$  and  $\delta^{18}\text{O}$  for samples from surface water (stream), springs, and snowpack. Number in brackets indicates number of samples of each type. The global meteoric water line and the local meteoric water line determined from all sampled precipitation are shown along with their equations (in the legend).

Table S1: Summary of all measurement locations

| <b>Name</b> | <b>Type</b>      | <b>Latitude (°)</b> | <b>Longitude (°)</b> | <b>Elevation (masl)</b> |
|-------------|------------------|---------------------|----------------------|-------------------------|
| PZ1         | Piezometer       | 46.231050           | 7.101070             | 1472                    |
| PZ2         | Piezometer       | 46.229640           | 7.101550             | 1482                    |
| PZ3         | Piezometer       | 46.227030           | 7.099260             | 1505                    |
| S1          | Soil temperature | 46.252600           | 7.108400             | 1240                    |
| S2          | Soil temperature | 46.225300           | 7.099900             | 1530                    |
| S3          | Soil temperature | 46.209200           | 7.071500             | 2640                    |
| AUBG        | Spring           | 46.251653           | 7.110543             | 1253                    |
| GRAS        | Spring           | 46.247227           | 7.106434             | 1351                    |
| ROCK        | Spring           | 46.235328           | 7.104408             | 1436                    |
| BRDG        | Spring           | 46.231520           | 7.101856             | 1464                    |
| ICEC        | Spring           | 46.221380           | 7.091970             | 1737                    |
| HyS1        | Streamflow       | 46.253233           | 7.109155             | 1200                    |
| HyS2        | Streamflow       | 46.231520           | 7.101856             | 1469                    |
| Auberge     | Weather station  | 46.251653           | 7.110543             | 1253                    |
| Chalet      | Weather station  | 46.229892           | 7.104117             | 1517                    |
| Glacier     | Weather station  | 46.207722           | 7.089613             | 2109                    |

Table S2: Table showing characteristic flow conditions for each period, corresponding start and end dates.  $Q_m$  is the median of raw data over the period.  $Q_{m7}$  is the median of daily values of average 7-day moving average data.  $Q_{r7}$  is the range of 7 day moving average data possible in one day. HH:MM is the median time of peak streamflow in a day.  $Q_b$  is the median baseflow, calculated as the lowest of the 7-day moving average streamflow in a ten-day window (based on method in Mächler et al., 2021).  $Q_f$  is the median of daily streamflow percentiles.  $\Delta Q_{m7}$  is the change in streamflow according to a 7-day window around 1 day.

| Period | Start Date | End Date  | $Q_m$ [m <sup>3</sup> /s] | $Q_{m7}$ [m <sup>3</sup> /s] | $Q_{r7}$ [m <sup>3</sup> /s] | HH:MM | $Q_b$ [m <sup>3</sup> /s] | $Q_f$ [%] | $\Delta Q_{m7}$ [m <sup>3</sup> /s/d] |
|--------|------------|-----------|---------------------------|------------------------------|------------------------------|-------|---------------------------|-----------|---------------------------------------|
| B0     | 01.Jan.16  | 31.Mar.16 | 0.59                      | 0.75                         | 0.02                         | 09:08 | 0.64                      | 15        | 0.01                                  |
| E0     | 31.Mar.16  | 06.May.16 | 2.44                      | 2.56                         | 0.11                         | 22:47 | 2.20                      | 58        | 0.10                                  |
| M0     | 06.May.16  | 24.Jun.16 | 9.72                      | 10.08                        | 0.37                         | 15:43 | 8.94                      | 93        | 0.11                                  |
| R1     | 24.Jun.16  | 27.Sep.16 | 3.87                      | 4.62                         | 0.15                         | 06:57 | 3.57                      | 74        | -0.12                                 |
| B1     | 27.Sep.16  | 18.Mar.17 | 1.05                      | 1.01                         | 0.02                         | 20:59 | 0.89                      | 27        | -0.01                                 |
| E1     | 18.Mar.17  | 06.May.17 | 2.23                      | 2.23                         | 0.06                         | 00:07 | 2.10                      | 52        | 0.02                                  |
| M1     | 06.May.17  | 02.Jun.17 | 6.84                      | 7.26                         | 0.33                         | 18:20 | 5.91                      | 84        | 0.31                                  |
| R2     | 02.Jun.17  | 27.Sep.17 | 4.04                      | 4.22                         | 0.15                         | 13:45 | 3.10                      | 70        | -0.08                                 |
| B2     | 27.Sep.17  | 08.Apr.18 | 1.01                      | 0.99                         | 0.02                         | 04:06 | 0.94                      | 26        | -0.01                                 |
| M2     | 08.Apr.18  | 31.May.18 | 7.85                      | 8.32                         | 0.31                         | 12:28 | 7.55                      | 87        | 0.19                                  |
| R3     | 31.May.18  | 01.Jan.19 | 4.59                      | 4.64                         | 0.09                         | 13:20 | 4.47                      | 74        | -0.06                                 |

Table S3: Start and end dates of each snowcover period at the soil temperature points.

| Soil temperature site | Start date | End date   |
|-----------------------|------------|------------|
| 1240 m asl.           | 3/2/2016   | 16/3/2016  |
|                       | 4/1/2017   | 13/3/2017  |
|                       | 25/11/2017 | 7/4/2018   |
| 1530 m asl.           | 1/1/2016   | 14/5/2016  |
|                       | 4/1/2017   | 9/5/2017   |
|                       | 5/11/2017  | 29/5/2018  |
| 2640 m asl.           | 1/1/2016   | 9/7/2016   |
|                       | 4/10/2016  | 25/11/2016 |
|                       | 4/1/2017   | 13/6/2017  |
|                       | 22/10/2017 | 6/6/2018   |

## REFERENCES

Mächler, E., Salyani, A., Walser, J. C., Larsen, A., Schaepli, B., Altermatt, F., and Ceperley, N.: Environmental DNA simultaneously informs hydrological and biodiversity characterization of an Alpine catchment, *Hydrol. Earth Syst. Sci.*, 1-30, 10.5194/hess-25-735-2021, 2021.

swissAlti3D: The digital elevation model of Switzerland, 2012.

Thornton, J. M., Brauchli, T., Mariethoz, G., and Brunner, P.: Efficient multi-objective calibration and uncertainty analysis of distributed snow simulations in rugged alpine terrain, *Journal of Hydrology*, 126241, <https://doi.org/10.1016/j.jhydrol.2021.126241>, 2021.
